# Supplementary material
Source: ML conference proceedings conference paper supplement (https://proceedings.neurips.cc/paper_files/paper/2023/hash/7e976afe805026f7d378a583af5ea9a2-Abstract.html)
Supplement: Supplementary file 1 [file 7e976afe805026f7d378a583af5ea9a2-Supplemental-Conference.zip]

Archive with 2 entries (2 files):
- supplementary-378.pdf
- submission-378.mp4
